1 **Title:** Host stress hormones affect host, but not vector, infectiousness for West Nile virus

2 **Running head:** Host stress hormones do not affect vector infectiousness

3 **Authors:** <sup>1</sup>Lynn B. Martin, <sup>1</sup>Meredith E. Kernbach, <sup>1</sup>Kyle Koller, <sup>2</sup>Nathan D. Burkett-Cadena,  
4 and <sup>1</sup>Thomas R. Unnasch

5

6 **Author Affiliations:**

7 <sup>1</sup>University of South Florida, Global Health Infectious Disease Research Center, College of  
8 Public Health, Tampa, FL 33620, USA

9 <sup>2</sup>University of Florida, Florida Medical Entomology Laboratory, Vero Beach, FL, 32962, USA

10

11 **Corresponding Author:** Lynn B. Martin, University of South Florida, Interdisciplinary  
12 Research Building (IDRB), 3720 Spectrum Boulevard, Suite 304, Tampa, FL 33612-9415.  
13 Phone: 813-974-0157; Email: lbmartin@health.usf.edu

14

15 **Keywords:** stress, disease, immune, wildlife, zoonosis, immunocompetence

16

17 **What is already known:** The extrinsic incubation period is one of the most influential  
18 parameters in epidemiological models; the more rapidly vectors become infectious after biting  
19 hosts, they more rapidly they can cause new infections. Host stress affects nearly all aspects of  
20 host-vector-virus interactions, but effects on the rate at which vectors become infectious has not  
21 yet been studied.

22

23 **What this study adds:** This study provides evidence that suppressive effects of stress hormones  
24 on avian host resistance to infection with West Nile virus (WNV) did not affect whether and how  
25 fast an important WNV vector, *Culex quinquefasciatus*, became infected with WNV. Host stress  
26 is subsequently unlikely to affect zoonotic disease cycles or emergence through this stage of the  
27 host-vector-virus interaction.

28 **Abstract:**

29 Hormones that help hosts cope with stressors also affect how hosts regulate the processes that  
30 influence their susceptibility to parasites as well as their propensity to transmit pathogens to  
31 other hosts and vectors. In birds, corticosterone (CORT), influences timing of activity, feeding  
32 behaviors, and various immune defenses that influence the number and outcomes of host  
33 interactions with vectors and parasites. No study to our knowledge, though, has investigated  
34 whether CORT in hosts affects the extrinsic incubation period (EIP) of a vector for a virus, one  
35 of the strongest drivers of vector-borne disease cycles. Our goal here was to discern whether  
36 experimental CORT alterations in zebra finches (*Taeniopygia guttata*) affected EIP for West  
37 Nile virus (WNV) in the mosquito, *Culex quinquefasciatus*, a common vector of WNV and other  
38 infections in the southern US. We experimentally manipulated CORT in birds, infected them  
39 with WNV, and then investigated whether EIP differed between vectors fed on CORT-treated or  
40 control birds. Although CORT enhanced WNV viremia in hosts, as we have observed  
41 previously, we found no effects of CORT on vector EIP or post-feeding mortality rates, another  
42 important component of epidemiological models. These results, plus our prior observations that  
43 CORT enhances host attractiveness, indicate that some but not all stages of host-vector-virus  
44 interactions are sensitive to host stress.

45

46

47

48

49

50

51

52

53

54

## 55 **Introduction**

56 Stressors, both anthropogenic and natural, affect the outcomes of infectious diseases at multiple  
57 levels of biological organization (Becker et al. 2019; Martin et al. 2016). For individuals,  
58 stressors can alter the behaviors that influence exposure probability to infected conspecifics and  
59 vectors (Barron et al. 2015). They can likewise affect the immune system processes that  
60 determine how effectively parasites are controlled (Dhabhar 2009) as well as the degree to which  
61 infected hosts experience morbidity and mortality (i.e., sickness behaviors and pathology)  
62 (Adelman and Martin 2009). Individual-level effects of stressors can also scale up to influence  
63 the emergence, persistence, and rates of spread of various infections in populations (Altizer et al.  
64 2018; Hawley and Altizer 2011; Martin et al. 2019a). Whereas the underlying mechanisms of  
65 such outcomes are numerous, inter-individual variation in host-parasite interactions can impinge  
66 on community level disease dynamics (Plowright et al. 2017).

67 For vectored infections, particular stages of host-parasite interactions have gained little to no  
68 attention with respect to stressors. One is the extrinsic incubation period (EIP) (Richards et al.  
69 2007), the rate at which vectors that rely on host blood for viability and especially reproduction  
70 become infectious from infected host blood-meals. Epidemiologically, EIP is a strong influence  
71 on disease prevalence and emergence (Foppa and Spielman 2007). Nevertheless, for most  
72 infections, we know little about whether stressors in hosts affect it, much less by what  
73 mechanisms (Dhondt and Dobson 2017). This paucity of study is somewhat surprising given  
74 that host bloodmeal composition can vary extensively among individuals in response to stressors,  
75 which could affect the viability of internal parasites prior to vector infection as well as the  
76 propensity of parasites to infect vectors (Hurd et al. 1995). Indeed, glucocorticoid hormones,  
77 which are commonly altered when vertebrates are exposed to unexpected or enduringly  
78 challenging stressors (Romero and Wingfield 2015), can alter host blood characteristics in such a  
79 manner that vector infection probability is changed (Beck et al. 2016). Likewise, glucocorticoids  
80 can affect host defensive behaviors towards vectors (Gervasi et al. 2016), which could alter the  
81 bloodmeal size taken by foraging vectors.

82 In the present study, our goal was to query directly whether glucocorticoids in avian hosts  
83 affected vector responses to a pathogen, West Nile virus. We did not expect direct effects of  
84 CORT on vector traits, as vectors lack glucocorticoid receptors. We expected any CORT effects

85 on EIP and mortality to arise indirectly, via the quantity or quality of host blood meals. In some  
86 vectors, larger blood meals can result in larger vector clutch sizes (Prasad 1987), probably  
87 because large blood meals contain more protein for vitellogenesis (Briegel 1990). Blood meal  
88 composition was also a plausible mechanism for any effects of CORT on vector EIP for WNV  
89 (Shieh and Rossignol 1992); chronic CORT elevation in many vertebrates can cause  
90 hyperglycemia and alter lipid levels (Dallman and Bhatnagar 2001) and decrease hematocrit  
91 (Beck et al. 2016; Gervasi et al. 2016), and most of the protein in blood is concentrated in  
92 hemoglobin (Hurd et al. 1995). Although such effects are not observed in all avian species in  
93 response to all stressors (Cyr et al. 2007), CORT-mediated alterations to blood composition  
94 could plausibly affect vector EIP (Vaidyanathan et al. 2008). We did not test these pathways by  
95 measuring bloodmeal size and composition, as efforts to do so would have complicated study  
96 design and potentially masked CORT effects on vector traits (due to excessive handling of  
97 birds). Here, our main focus was to test whether avian corticosterone (CORT) affects vector EIP  
98 in an important arboviral system, the interaction among West Nile virus (WNV), one passerine  
99 host, the zebra finch (*Taeniopygia guttata*), and one of the most common vectors of WNV in the  
100 southeastern US, *Culex quinquefasciatus* (Rochlin et al. 2019).

101 Our choice of this system was a natural extension and progression of our previous findings that  
102 experimental corticosterone (CORT) manipulation made individual zebra finches twice as  
103 attractive (Gervasi et al. 2016) and more infectious (Gervasi et al. 2017a) to vectors, which  
104 probably equates to higher competence in natural systems. Indeed, birds that attract more  
105 vectors and also circulate virus for long periods above thresholds where vectors are likely to  
106 become infectious themselves should generate more infectious, and thus be more competent,  
107 than those that clear virus quickly or never let it reach transmissible titers. Here, we sought to  
108 determine if CORT might further enhance host competence by shortening vector EIP; such  
109 effects when coupled with greater attractiveness and infectiousness of hosts could make host  
110 stress a very strong driver of disease epidemics. As in our previous work, we implanted finches  
111 with CORT (or sham controls), allowed CORT to change in circulation for several days, exposed  
112 finches to WNV experimentally, allowed mosquitoes to feed on birds at peak viremia (4d post-  
113 infection), then queried whether CORT treatment affected mosquito mortality rate and EIP,  
114 specifically the rate at which WNV reached mosquito salivary glands.

## 115 **Methods**

116 *Study organisms:* We studied WNV in zebra finches and *Cx. quinquefasciatus* for three reasons.  
117 First, we sought to complete a series of studies on the same host, vector, and virus interactions  
118 for direct comparisons so that we could ultimately examine simultaneously all the pathways by  
119 which host stress hormones might affect local disease dynamics. As above, we had studied  
120 CORT effects on vector feeding choice, anti-vector behaviors, host and resistance and tolerance  
121 of WNV previously (Gervasi et al. 2017a; Gervasi et al. 2016). EIP was a logical and important  
122 next step in the epidemiological pathway. Second, we chose *Cx. quinquefasciatus* because it is  
123 one of the more common mosquito vectors of WNV in the southeastern US (Burkett-Cadena  
124 2013) and was also the focus of our prior work (Gervasi et al. 2016). Zebra finch responses to  
125 WNV, too, had been studied before by us (Gervasi et al. 2017a) and others (Hofmeister et al.  
126 2017; Newhouse et al. 2017). Our original choice of this avian species was due to its sequenced  
127 genome, simple husbandry, and the ability to breed it in captivity so as to obtain large sample  
128 sizes. Captive breeding also ensured no prior exposure, ecologically or evolutionarily, to WNV.  
129 Third, we chose WNV because it is the most broadly distributed arbovirus and most important  
130 causative agent of viral encephalitis worldwide (Paz 2019). Since its introduction to the US in  
131 1999, WNV has infected almost 40,000 humans, 1,667 of whom died from the neuroinvasive  
132 form (WNND). WNV is predominantly an infection of passerines and ornithophilic vectors, and  
133 continues to have large consequences for passerines (LaDeau et al. 2007), although it can be  
134 transmitted by as many as 45 vector species (Kramer et al. 2007; Marra et al. 2004).

135

136 *Bird husbandry and CORT and WNV exposure:* We obtained 18 adult zebra finches from an  
137 active breeding colony maintained at the University of South Florida. Specific birds used in the  
138 study came from groups of 15 - 18 birds housed together in free-flight cages (90x60x60 cm).  
139 Birds were randomly chosen from the above groups and assigned to one of three treatments:  
140 control (sham, CORT+, or CORT++ (Ouyang et al. 2013)). During the experiment itself, birds  
141 were housed singly in 30.48 cm<sup>3</sup> mosquito-proof cages (BioQuip, Rancho Dominguez, CA,  
142 USA, product # 1450 BSV), but a clear plastic panel on one side of each cage enabled birds to  
143 remain in sight of each other and a mesh covering on another side of each cage permitted audial  
144 contact of conspecifics. Birds were individually housed for 3 days prior to hormone

145 implantation, allowed to recover from surgery for 2 days, then moved to an Animal Biosafety  
146 Level (ABSL) 3 facility where they acclimated for another 24 h before being exposed to WNV.  
147 For the duration of the study, all birds received ABBA 1900 exotic finch food (ABBA Products  
148 Corp., Hillside, NJ), photoperiod was kept at 13h light:11h dark (on at 0600 and off at 1900), and  
149 room temperature and relative humidity were maintained at ~21°C and ~50%, respectively. All  
150 birds were housed in proximity to each other for the study duration, and all procedures complied  
151 with approved USF animal care and use and biosafety protocols.

152 For CORT treatments, we implanted 18 birds total subcutaneously (s.q.), some with CORT (n =  
153 12) and some (n = 6) with sham treatments (7mm long; inner diameter 1.5 mm, Dow Corning,  
154 Midland MI, product #508-006); importantly, though, we implanted 6 birds with 2 CORT-filled  
155 silastic tubules (3 males and 3 females) and 6 birds with 1 CORT-filled tubules (3 males and 3  
156 females). Control birds (3 males and 3 females) received an empty silastic tubule (Gervasi et al.  
157 2017b; Gervasi et al. 2016; Ouyang et al. 2013). Implantation of different numbers of tubules  
158 was intended to cause dose-dependent elevations of CORT in the blood. All tubules were sealed  
159 (Dow Corning, Midland, MI, product #732) several days prior to implant, but minutes before  
160 each implantation, a 0.5 mm hole was bored through each implant to optimize efflux of hormone  
161 (Ouyang et al., 2013). Tubules were then implanted on one flank of each bird while it was  
162 sedated with light isoflurane anesthesia. After implantation, wounds were sealed with surgical  
163 adhesive (Vetbond, 3M, St. Paul, MN, product #1469). All birds returned to normal activity  
164 (perching and feeding) within minutes of implantation.

165 Once CORT had time to take effect (3 days after implantation), each bird was exposed to  $1 \times 10^7$   
166 PFU WNV (NY99) via s.q. injection (Gervasi et al., 2017). Blood samples (75ul) were then  
167 taken around 0800h 4 days after WNV exposure (d.p.e.) to quantify viremia in birds; after blood  
168 sampling, serum was removed from samples and stored at -40°C until RNA extraction. On day 4  
169 post WNV exposure, we introduced 23 mosquitoes into the cage of each bird 1h before lights-out  
170 (~1900h). We allowed mosquitoes to feed on birds until the following morning (0600), at which  
171 point several blood-fed mosquitoes (based on visual inspection of abdomens) were aspirated  
172 from each bird cage into separate plastic containers (Glad, 32 oz bowls with 1.5 oz water-filled  
173 plastic cups in the bottom; all mosquitoes housed singly) for the next 12 days. Plastic domiciles  
174 were also lined with wet paper towels to foster high humidity as well as a paper card laden with

175 honey for collection of mosquito saliva from which we could later assess WNV presence  
176 (Burkett-Cadena et al. 2016). Fresh ‘honey-cards’ were added to each mosquito domicile every  
177 other day, and used cards were removed and stored (-80°C) until extractions for WNV detection.  
178 We also monitored mosquito survival over this same period. Uninfected birds were not included  
179 in this study for two reasons: i) we had insufficient space in the ABSL-3 facility for additional  
180 birds, and ii) our goal was to assess CORT effects on vector EIP, which requires WNV infection.

#### 181 *Mosquito husbandry*

182 A laboratory colony of *Cx. quinquefasciatus* was established using a previous colony (generation  
183 > F100) from Indian River County, FL. Larvae were reared at 28°C and maintained under a  
184 14:10 (light:dark) cycle. Three to four egg rafts (200-300 eggs each) were placed in larval  
185 rearing pans (45.7 cm × 53.3 cm × 7.62 cm) containing approximately 3L tap water. Larvae were  
186 fed daily with (20 mg/mL) of 1:1 Brewer’s yeast and lactalbumin. Pupae were transferred to  
187 containers with ~250 mL of clean water and placed into cages (30.48 cm<sup>3</sup>) for emergence. Adults  
188 were provided 20% sucrose *ad libitum* until 24 hours prior to experiments, when was removed.  
189 Females were transported to USF in one-liter cardboard holding containers with mesh screen  
190 tops where they were held without food for <2d until introduction to bird cages. Only females of  
191 uniform age were used (typically 7-10 days post emergence).

192 *WNV quantification in avian sera and mosquito saliva:* We used quantitative real-time  
193 polymerase chain reaction (qRT-PCR) to measure WNV viremia in birds (Gervasi et al., 2017;  
194 Burgan et al., 2018). Briefly, viral RNA was extracted from serum samples with the QIAmp  
195 Viral RNA kit (Qiagen Cat. No. 52906). We used 10 µl of serum diluted in 130 µl sterile PBS  
196 and followed the kit protocol for all steps. We then used a one-step Taq-based kit to quantify  
197 viral RNA in samples (iTaq Universal Probes One-Step Kit; Bio-Rad Cat. No. 1725141). As in  
198 the past, our forward primer sequence was 5’ CAGACCACGCTACGGCG 3’; reverse sequence  
199 was 5’ CTAGGGCCGCGTGGG 3’; and our WNV probe sequence was  
200 5’ [6~FAM] CTGCGGAGAGTGCAGTCTGCGAT [BHQ1a~6FAM]. All samples were  
201 measured in duplicate, and a negative control and a known WNV-positive control were run  
202 concurrently on all plates. WNV standard curves were generated from serial dilutions of the  
203 same stock virus used in finch inoculations, in which viral titer was quantified previously using  
204 Vero cell plaque assay. All samples on all plates were captured by our standard curves.

205 *WNV quantification in mosquitoes:* WNV positivity in mosquito saliva (i.e., on honey cards)  
206 was assessed at 6, 8, 10- and 12-days post-feeding on birds, as viral dissemination and  
207 maturation typically takes about 10 days in *Cx. quinquefasciatus* under ideal conditions  
208 (Richards et al. 2007). We queried infections status at all 4 time points to ensure that any  
209 expediting or slowing effects of CORT were captured.

210 *Data analysis:* We used ANOVAs to compare effects of CORT treatments on avian viremia, the  
211 number of mosquitoes surviving the overnight feed, and the number becoming blood-engorged  
212 during that feed; Levene's test indicated no heteroscedasticity among groups, and data were  
213 normally distributed. We used Cox survival analyses to assess host CORT treatment and viremia  
214 effects on mosquito mortality and infection rates. We used SPSS v24 for all analyses, and  
215 GraphPad Prism v6 for all figures, setting alpha to 0.05.

216

## 217 **Results:**

218 *Hormone implant effects on avian viremia:* CORT effects on viremia were not statistically  
219 significant when we compared all three groups against each other ( $F_{2,16} = 4.5$ ,  $P = 0.09$ , Fig. 1A),  
220 but the tendency for CORT-treated birds to have higher viremia and the precedent from our prior  
221 work that our two implant categories rarely differed with respect to effects on finch WNV  
222 responses motivated us to combine the two CORT groups here into a single group (Gervasi et al.  
223 2017a; Gervasi et al. 2016). That approach revealed that viremia was higher in CORT-implanted  
224 birds compared to controls ( $F_{1,16} = 5.9$ ,  $P = 0.03$ ; Fig. 1B), as observed in the past. Sex of birds  
225 did not influence viremia ( $F_{1,16} = 0.49$ ,  $P = 0.50$ ).

226 *CORT implant effects on mosquito overnight survival and feeding success:* CORT treatment did  
227 not affect the number of mosquitoes remaining alive after they were co-housed with birds  
228 overnight ( $F_{2,16} = 2.61$ ,  $P = 0.11$ ; Fig. 2A), nor the number of fully-engorged mosquitoes  
229 collected from bird cages the morning after trials ( $F_{2,16} = 1.86$ ,  $P = 0.19$ ; Fig. 2B). When we  
230 merged CORT+ and CORT++ birds into a single 'CORT' group, we observed similar non-  
231 significant outcomes (mosquitoes alive:  $F_{1,16} = 0.65$ ,  $P = 0.43$ ; blood-engorged mosquitoes  
232 recovered:  $F_{1,16} = 0.93$ ,  $P = 0.35$ ). However, whereas for each control and CORT+ bird, at least  
233 some mosquitoes fed successfully, blood-fed mosquitoes were collected from only 3 CORT++



234 birds. One male CORT++ bird died prior to mosquito exposure, and cages of 2 CORT++ birds  
235 contained no blood-fed mosquitoes the morning of collection.

236 *CORT effects on mosquito mortality rate post blood-feeding:* Fifteen mosquitoes died prior to  
237 assessing WNV infection status, which explains the disparity in sample sizes between Fig. 3A  
238 and 3B. When all three CORT treatments of birds were considered separately, neither CORT  
239 treatment, nor viremia in birds, nor their interaction affected mosquito mortality rates (omnibus  
240  $\chi^2_5 = 4.2$ ,  $P = 0.52$ ). Analyzing both CORT treatments as a single group in a similar model  
241 produced similar non-significant results (omnibus  $\chi^2_3 = 1.1$ ,  $P = 0.77$ ).

242 *CORT effects on extrinsic incubation period for WNV:* Neither CORT, nor viremia in birds nor  
243 their interaction affected the rate at which mosquitoes became infected with WNV. Results were  
244 consistent when we analyzed the two CORT groups separately (omnibus  $\chi^2_5 = 3.9$ ,  $P = 0.56$ ; Fig.  
245 3B) and when CORT groups were collapsed and compared to controls (omnibus  $\chi^2_3 = 3.6$ ,  $P =$   
246 0.30).

247

## 248 **Discussion**

249 As in our previous work, we found that CORT treatment elevated WNV titer in zebra finches,  
250 compared to controls (Gervasi et al. 2017a; Gervasi et al. 2016). CORT did not influence the  
251 number of mosquitoes that survived a night of feeding on birds, though, nor the number of  
252 mosquitoes that successfully obtained a blood-meal from hosts. Likewise, neither CORT  
253 treatment nor viremia from the avian host affected mosquito mortality rates or the rate at which  
254 WNV became detectable in vector saliva (i.e., EIP). Below we discuss the ramifications of these  
255 results, particularly in relation to our other work that CORT affects vector choice of hosts and  
256 host viremia.

257 *CORT effects on avian responses to WNV:* We found similar enhance effects of CORT on  
258 WNV viremia in this species. Given the small sample sizes of birds we had to study, enhance  
259 effects of CORT on viremia were only observed when CORT treatment groups were combined.  
260 In all previous studies involving this implantation technique in finches exposed to WNV, we  
261 have taken an identical approach, combing CORT treatments into a single group. Our original

262 motivation for studying two different implant types was to identify protective levels of CORT  
263 (Martin 2009), assuming that the single implant would be protective and the double implant  
264 detrimental to host resistance and/or health. However, in no study yet have we been able to  
265 detect such subtle effects including another whereby we transiently elevated CORT via injection  
266 (Martin et al. 2019b). Injected and implanted CORT elevated circulating CORT to the same  
267 levels in birds, but viremia was only increased in implanted birds relative to controls. Injected  
268 CORT was not protective, as injected and control bird viremias were indistinguishable.

269 In previous publications (Gervasi et al., 2016, 2017), we have extensively discussed the potential  
270 limitations of our approach to manipulating CORT, a hormone that is tightly regulated by  
271 multiple positive and negative feedback loops (Romero and Wingfield 2015). We are aware of  
272 the great difficulties of simulating natural fluctuations in circulating concentrations of this  
273 hormone (MacDougall-Shackleton et al. 2019), and we do not claim that our method is ideal.  
274 Here and elsewhere, our implants were intended to simulate physiological responses to a brief  
275 food shortage, prolonged weather event, or comparable stressor, which would be expected to  
276 alter CORT concentrations for the same period as our method. Nevertheless, over the same 2-  
277 day periods, expression of glucocorticoid receptors as well as other intermediaries of CORT  
278 regulation (i.e., binding globulins in blood, cytosolic co-receptors, etc.) are apt to change in  
279 response to CORT manipulation (Romero and Wingfield 2015), making variation in CORT  
280 concentrations among individuals difficult to interpret functionally. As other methods of CORT  
281 administration (e.g., injection, addition to drinking water, osmotic pumps, etc.) also have  
282 practical and inferential limitations, our perspective has been to emphasize the inferential limits  
283 of our study while also appreciating that we cannot experimentally infect wild birds with WNV  
284 after natural stressors, a preferable but ethically impossible design. In the end, we favored  
285 experimental tractability and replicability, but we agree that pairing controlled studies such as  
286 ours with creative, complementary fieldwork will ultimately be the best option for this complex  
287 topic.

288 *Lack of CORT effects on vector mortality and EIP:* CORT treatment did not affect the rate at  
289 which vectors died, nor vector EIP. Host viremia, too, (alone and in interaction with CORT  
290 treatment) did not affect either rate. Null results are always difficult to interpret, but our study  
291 design provides some insight. First, it is unlikely that null results are driven by sample size;

292 although we had fairly few birds on which to feed mosquitoes, we tracked survival and EIP in a  
293 large number of mosquitoes. It is thus unlikely that non-significant effects of CORT were due to  
294 low statistical power. Second, we revealed >75% of mosquitoes became infectious by 12-days  
295 post-feeding. This duration is consistent with other studies, but ours is the first (of which we are  
296 aware) that has estimated infection rates using passerines as hosts.

297 Our third discovery is perhaps the most enlightening ecologically; we discovered that even  
298 control-implanted finches, which never reached  $10^5$  pfu ml<sup>-1</sup> virus in circulation, were  
299 comparably infectious to *Culex* vectors as CORT birds. In our previous work, we conservatively  
300 recognized 5 logs as the transmission threshold birds must surpass to become infectious to  
301 vectors (Turell et al. 2000), however, others emphasize 4 logs (Kilpatrick et al. 2007; Tolsá et al.  
302 2018). Here, it was clear that finches with a 4 log WNV titer, on average, can infect a key  
303 vector. However, we detected no effects of individual-level viremia on vector EIP or mortality  
304 rate in CORT-treated or control finches.

305 *Epidemiological implications of our data:* We found no evidence that our CORT treatments  
306 altered the rate at which *C. quinquefasciatus* became infectious with WNV, nor did we observe  
307 any influence of CORT on vector mortality rates. These results indicate that any effects of host  
308 stress, as captured by our experimental approach, will manifest via other stages of the host-  
309 vector-virus interaction. Indeed, our other work clearly implicates host stress (as represented by  
310 sustained CORT elevations) as a potentially important driver of spatiotemporal variation in  
311 WNV risk. Identical CORT treatments to the ones used here make finches 2x more attractive to  
312 vectors than controls (Gervasi et al. 2016) and double the period of infectiousness (Gervasi et al.  
313 2017a). The next step would be to integrate all of these effects into a single mathematical  
314 framework (Bergsman et al. 2016). We conducted a similar exercise recently with regard to light  
315 pollution effects on WNV viremia in house sparrows (*Passer domesticus*). Exposure to one form  
316 of light pollution, artificial light at night, extended the WNV infectious period of this avian  
317 species by 20% (Kernbach et al. 2019). When we estimated how this effect on host competence  
318 would change  $R_0$ , the number of new infections expected to be generated by one infectious host  
319 in a wholly susceptible population, we found that risk increased by 41%.

320 Even though our data do not implicate host CORT as an important driver of EIP or mosquito  
321 viability, we hope that they inspire additional efforts to investigate the effects of anthropogenic  
322 stressors on emerging infectious diseases and especially zoonoses. Of course, many natural  
323 stressors such as predation risk, competition, co-infection, and other forces can have sublethal  
324 influences on hosts, which can alter the rates at which diseases emerge and spread (Buck et al.  
325 2018; Mierzejewski et al. 2019). We encourage that special attention be directed to  
326 anthropogenic stressors such as pollutants, non-native species introductions, habitat loss and  
327 degradation, climate change, urbanization, and other human activities (Martin and Boruta 2014;  
328 Martin et al. 2010), as these are apt to alter host, vector, and parasite biology in diverse ways,  
329 none of which will have been common in the evolutionary history of most species. We also  
330 encourage additional work to reveal whether blood or protein composition is affected in a  
331 manner that might impact mosquito productivity or EIP, in spite of the null effects we detected  
332 with our experimental design. Finally, we encourage research of stress hormone effects on other  
333 avian and vector species, as competence varies extensively both within and among host *and*  
334 vector species (Tolsá et al. 2018; Turell et al. 2005). Some species might be more susceptible  
335 than others to stressors (Martin et al. 2010; Paull et al. 2011), and further, vector and host  
336 behaviors and densities might change contingent on context (Levine et al. 2013) (Apperson et al.  
337 2004; Goodman et al. 2018). Even some individuals might contribute more to local epidemics  
338 than others (Scott et al. 1990), highlighting the need to consider ecological context (Gervasi et al.  
339 2015) as well as evolutionary history (Downs et al. 2019) when aspiring to manage disease risk  
340 (Martin et al. 2019a).

341

## 342 **Acknowledgements**

343 We recognize NSF-IOS grant 1257773 and the USF College of Public Health for support.

344

345

## 346 **Figure legends**

347 **Fig. 1.** Effects of corticosterone (CORT) on zebra finch responses to West Nile virus infection 4 days  
348 post-exposure. A) viremia did not differ among groups when CORT-treatment groups were compared

349 separately to controls, but B) when CORT-treatments were collapsed into one group, treated birds  
350 had higher viremia than controls. Bars depict means  $\pm$  1 SE.

351 **Fig. 2.** Corticosterone treatment did not affect A.) number of mosquitoes found alive or B.) number  
352 of fully engorged mosquitoes the morning post-feeding. Bars are means  $\pm$  1SE; dotted line denotes  
353 total number of mosquitoes (n = 23) to which birds were exposed the prior evening. In A., numbers  
354 above bars denote total birds from which mosquitoes were collected the following morning and total  
355 mosquitoes studied for WNV infectivity.

356 **Fig. 3.** No effects of corticosterone treatment of finches on A. mortality rate or B. WNV infection  
357 rate of *C. quinquefasciatus*. Lines denote A. survival or B. cumulative infection curves (% of birds)  
358 over the 14-day monitoring period. Shaded area in A. denotes period of screening of mosquito saliva  
359 for WNV (i.e., data comprising figure 3B). Sample sizes depicted in color denote mosquitoes in each  
360 respective group at the time mortality or WNV infection surveillance began.

361

## 362 Literature Cited

363 Adelman, J., and L. Martin. 2009. Vertebrate sickness behavior: an adaptive and integrated  
364 neuroendocrine immune response. *Integrative and Comparative Biology* 49: 202-214.

365 Altizer, S., D.J. Becker, J.H. Epstein, K.M. Forbes, T.R. Gillespie, R.J. Hall, D.M. Hawley, S.M.  
366 Hernandez, L.B. Martin, R.K. Plowright, D.A. Satterfield and D.G. Streicker. 2018. Food for  
367 contagion: synthesis and future directions for studying host–parasite responses to resource shifts  
368 in anthropogenic environments. *Philosophical Transactions of the Royal Society B: Biological*  
369 *Sciences* 373.

370 Apperson, C.S., H.K. Hassan, B.A. Harrison, H.M. Savage, S.E. Aspen, A. Farajollahi, W.  
371 Crans, T.J. Daniels, R.C. Falco and M. Benedict. 2004. Host feeding patterns of established and  
372 potential mosquito vectors of West Nile virus in the eastern United States. *Vector-Borne and*  
373 *Zoonotic Diseases* 4: 71-82.

374 Barron, D., S. Gervasi, J. Pruitt and L. Martin. 2015. Behavioral competence: how host  
375 behaviors can interact to influence parasite transmission risk. *Current Opinion in Behavioral*  
376 *Sciences*.

377 Beck, M.L., S. Davies, I.T. Moore, L.A. Schoenle, K. Kerman, B.J. Vernasco and K.B. Sewall.  
378 2016. Beeswax corticosterone implants produce long-term elevation of plasma corticosterone  
379 and influence condition. *General and Comparative Endocrinology* 233: 109-114.

380 Becker, D.J., C.J. Downs and L.B. Martin. 2019. Multi-scale drivers of immunological variation  
381 and consequences for infectious disease dynamics. *Integrative and Comparative Biology* 59:  
382 1129-1137.

383 Bergsman, L.D., J.M. Hyman and C.A. Manore. 2016. A mathematical model for the spread of  
384 West Nile virus in migratory and resident birds. *Mathematical Biosciences & Engineering* 13:  
385 401-424.

386 Briegel, H. 1990. Fecundity, metabolism, and body size in *Anopheles* (Diptera: Culicidae),  
387 vectors of malaria. *Journal of Medical Entomology* 27: 839-850.

388 Buck, J., S. Weinstein and H. Young. 2018. Ecological and evolutionary consequences of  
389 parasite avoidance. *Trends in Ecology & Evolution* 33: 619-632.

390 Burkett-Cadena, N.D. 2013. Mosquitoes of the southeastern United States. University of  
391 Alabama Press.

392 Burkett-Cadena, N.D., J. Gibson, M. Lauth, T. Stenn, C. Acevedo, R.-d. Xue, J. McNelly, E.  
393 Northey, H.K. Hassan and A. Fulcher. 2016. Evaluation of the Honey-Card Technique for  
394 Detection of Transmission of Arboviruses in Florida and Comparison With Sentinel Chicken  
395 Seroconversion. *Journal of Medical Entomology* 53: 1449-1457.

396 Cyr, N.E., K. Earle, C. Tam and L.M. Romero. 2007. The effect of chronic psychological stress  
397 on corticosterone, plasma metabolites, and immune responsiveness in European starlings.  
398 *General and Comparative Endocrinology* 154: 59-66.

399 Dallman, M.F., and S. Bhatnagar. 2001. Chronic stress and energy balance: role of the  
400 hypothalamo-pituitary-adrenal axis. *Handbook of physiology*; section 7: 179-210.

401 Dhabhar, F.S. 2009. A hassle a day may keep the pathogens away: The fight-or-flight stress  
402 response and the augmentation of immune function. *Integrative and Comparative Biology* 49:  
403 215-236.

404 Dhondt, A.A., and A.P. Dobson. 2017. Stress hormones bring birds, pathogens and mosquitoes  
405 together. *Trends in Parasitology* 33: 339-341.

406 Downs, C.J., L.A. Schoenle, B.A. Han, J.F. Harrison and L.B. Martin. 2019. Scaling of Host  
407 Competence. *Trends in Parasitology*.

- 408 Foppa, I.M., and A. Spielman. 2007. Does reservoir host mortality enhance transmission of West  
409 Nile virus? *Theoretical Biology and Medical Modelling* 4: 17.
- 410 Gervasi, S.S., S.C. Burgan, E. Hofmeister, T.R. Unnasch and L.B. Martin. 2017a. Stress  
411 hormones predict a host superspreader phenotype in the West Nile virus system. p. 20171090.  
412 *Proc. R. Soc. B. The Royal Society*.
- 413 Gervasi, S.S., S.C. Burgan, E.K. Hofmeister, T.R. Unnasch and L.B. Martin. 2017b. Stress  
414 hormones predict a host superspreader phenotype in the West Nile virus system. *Proceedings of*  
415 *the Royal Society B* in press.
- 416 Gervasi, S.S., N. Burkett-Cadena, S.C. Burgan, A.W. Schrey, H.K. Hassan, T.R. Unnasch and  
417 L.B. Martin. 2016. Host stress hormones alter vector feeding preferences, success, and  
418 productivity. p. 20161278. *Proc. R. Soc. B. The Royal Society*.
- 419 Gervasi, S.S., D.J. Civitello, H.J. Kilvitis and L.B. Martin. 2015. The context of host  
420 competence: a role for plasticity in host–parasite dynamics. *Trends in Parasitology* 31: 419-425.
- 421 Goodman, H., A. Egizi, D.M. Fonseca, P.T. Leisnham and S.L. LaDeau. 2018. Primary blood-  
422 hosts of mosquitoes are influenced by social and ecological conditions in a complex urban  
423 landscape. *Parasites & vectors* 11: 218.
- 424 Hawley, D.M., and S.M. Altizer. 2011. Disease ecology meets ecological immunology:  
425 understanding the links between organismal immunity and infection dynamics in natural  
426 populations. *Functional Ecology* 25: 48-60.
- 427 Hofmeister, E.K., M. Lund, V. Shearn-Bochsler and C.N. Balakrishnan. 2017. Susceptibility and  
428 antibody response of the laboratory model zebra finch (*Taeniopygia guttata*) to West Nile virus.  
429 *PLoS One* 12: e0167876.
- 430 Hurd, H., J. Hogg and M. Renshaw. 1995. Interactions between bloodfeeding, fecundity and  
431 infection in mosquitoes. *Parasitology Today* 11: 411-416.
- 432 Kernbach, M.E., D.J. Newhouse, J.M. Miller, R.J. Hall, J. Gibbons, J. Oberstaller, D. Selechnik,  
433 R.H. Jiang, T.R. Unnasch and C.N. Balakrishnan. 2019. Light pollution increases West Nile  
434 virus competence of a ubiquitous passerine reservoir species. *Proceedings of the Royal Society B*  
435 286: 20191051.
- 436 Kilpatrick, A.M., S.L. LaDeau and P.P. Marra. 2007. Ecology of west nile virus transmission and  
437 its impact on birds in the western hemisphere. *Auk* 124: 1121-1136.
- 438 Kramer, L.D., J. Li and P.Y. Shi. 2007. West Nile virus. *Lancet Neurology* 6: 171-181.

439 LaDeau, S.L., A.M. Kilpatrick and P.P. Marra. 2007. West Nile virus emergence and large-scale  
440 declines of North American bird populations. *Nature* 447: 710-714.

441 Levine, R.S., D.G. Mead and U.D. Kitron. 2013. Limited spillover to humans from West Nile  
442 virus viremic birds in Atlanta, Georgia. *Vector-Borne and Zoonotic Diseases* 13: 812-817.

443 MacDougall-Shackleton, S.A., F. Bonier, L.M. Romero and I.T. Moore. 2019. Glucocorticoids  
444 and “stress” are not synonymous. *Integrative Organismal Biology* 1: obz017.

445 Marra, P.P., S. Griffing, C. Caffrey, A.M. Kilpatrick, R. McLean, C. Brand, E. Saito, A.P.  
446 Dupuis, L. Kramer and R. Novak. 2004. West Nile virus and wildlife. *Bioscience* 54: 393-402.

447 Martin, L.B. 2009. Stress and immunity in wild vertebrates: timing is everything. *General and*  
448 *Comparative Endocrinology* 163: 70-76.

449 Martin, L.B., B. Addison, A.G.D. Bean, K.L. Buchanan, O.L. Crino, J.R. Eastwood, A.S. Flies,  
450 R. Hamede, G.E. Hill, M. Klaassen, R.E. Koch, J.M. Martens, C. Napolitano, E.J. Narayan, L.  
451 Peacock, A.J. Peel, A. Peters, N. Raven, A. Risely, M.J. Roast, L.A. Rollins, M. Ruiz-Aravena,  
452 D. Selechnik, H.S. Stokes, B. Ujvari and L.F. Grogan. 2019a. Extreme Competence: Keystone  
453 Hosts of Infections. *Trends in Ecology & Evolution* 34: 303-314.

454 Martin, L.B., and M. Boruta. 2014. The impacts of urbanization on avian disease transmission  
455 and emergence. in D. Gil and H. Brumm, eds. *Avian Urban Ecology*. Oxford University.

456 Martin, L.B., S.C. Burgan, J.S. Adelman and S.S. Gervasi. 2016. Host competence: an  
457 organismal trait to integrate immunology and epidemiology. *Integrative and Comparative*  
458 *Biology* in press.

459 Martin, L.B., W.A. Hopkins, L. Mydlarz and J.R. Rohr. 2010. The effects of anthropogenic  
460 global changes on immune functions and disease resistance. *Ann N Y Acad Sci* 1195: 129-148.

461 Martin, L.B., M.E. Kernbach and T.R. Unnasch. 2019b. Distinct effects of acute versus chronic  
462 corticosterone exposure on Zebra finch responses to West Nile virus. *Conservation Physiology* 7:  
463 coz094.

464 Mierzejewski, M.K., C.J. Horn and L.T. Luong. 2019. Ecology of fear: environment-dependent  
465 parasite avoidance among ovipositing *Drosophila*. *Parasitology* 146: 1564-1570.

466 Newhouse, D.J., E.K. Hofmeister and C.N. Balakrishnan. 2017. Transcriptional response to West  
467 Nile virus infection in the zebra finch (*Taeniopygia guttata*). *Royal Society open science* 4:  
468 170296.



- 469 Ouyang, J.Q., M. Muturi, M. Quetting and M. Hau. 2013. Small increases in corticosterone  
470 before the breeding season increase parental investment but not fitness in a wild passerine bird.  
471 *Hormones and Behavior* 63: 776-781.
- 472 Paull, S.H., S. Song, K.M. McClure, L.C. Sackett, A.M. Kilpatrick and P.T. Johnson. 2011.  
473 From superspreaders to disease hotspots: linking transmission across hosts and space. *Frontiers*  
474 *in Ecology and the Environment* 10: 75-82.
- 475 Paz, S. 2019. Effects of climate change on vector-borne diseases: an updated focus on West Nile  
476 virus in humans. *Emerging Topics in Life Sciences* 3: 143-152.
- 477 Plowright, R.K., C.R. Parrish, H. McCallum, P.J. Hudson, A.I. Ko, A.L. Graham and J.O. Lloyd-  
478 Smith. 2017. Pathways to zoonotic spillover. *Nature Reviews Microbiology* 15: 502.
- 479 Prasad, R. 1987. Nutrition and reproduction in haematophagous arthropods. *Proceedings: Animal*  
480 *Sciences* 96: 253-273.
- 481 Richards, S.L., C.N. Mores, C.C. Lord and W.J. Tabachnick. 2007. Impact of extrinsic  
482 incubation temperature and virus exposure on vector competence of *Culex pipiens*  
483 *quinquefasciatus* Say (Diptera: Culicidae) for West Nile virus. *Vector-Borne and Zoonotic*  
484 *Diseases* 7: 629-636.
- 485 Rochlin, I., A. Faraji, K. Healy and T.G. Andreadis. 2019. West Nile Virus Mosquito Vectors in  
486 North America. *Journal of Medical Entomology* 56: 1475-1490.
- 487 Romero, L.M., and J.C. Wingfield. 2015. Tempests, poxes, predators, and people: stress in wild  
488 animals and how they cope. Oxford University Press.
- 489 Scott, T.W., L.H. Lorenz and J.D. Edman. 1990. Effects of House Sparrow Age and Arbovirus  
490 Infection on Attraction of Mosquitoes. *Journal of Medical Entomology* 27: 856-863.
- 491 Shieh, J.-N., and P. Rossignol. 1992. Opposite influences of host anaemia on blood feeding rate  
492 and fecundity of mosquitoes. *Parasitology* 105: 159-163.
- 493 Tolsá, M.J., G.E. García-Peña, O. Rico-Chávez, B. Roche and G. Suzán. 2018. Macroecology of  
494 birds potentially susceptible to West Nile virus. *Proceedings of the Royal Society B* 285:  
495 20182178.
- 496 Turell, M.J., D.J. Dohm, M.R. Sardelis, M.L. O'guinn, T.G. Andreadis and J.A. Blow. 2005. An  
497 update on the potential of North American mosquitoes (Diptera: Culicidae) to transmit West Nile  
498 virus. *Journal of Medical Entomology* 42: 57-62.

499 Turell, M.J., M. O'Guinn and J. Oliver. 2000. Potential for New York mosquitoes to transmit  
500 West Nile virus. *The American Journal of Tropical Medicine and Hygiene* 62: 413-414.  
501 Vaidyanathan, R., A.E. Fleisher, S.L. Minnick, K.A. Simmons and T.W. Scott. 2008. Nutritional  
502 stress affects mosquito survival and vector competence for West Nile virus. *Vector-Borne and*  
503 *Zoonotic Diseases* 8: 727-732.  
504

**Fig. 1 Effects of corticosterone (CORT) on finch responses to West Nile virus infection 4 days post-exposure. A) viremia did not differ among groups when CORT-treatment groups were compared separately to controls, but B) when CORT-treatments were collapsed into one group, treated birds had higher viremia than controls. Bars depict means  $\pm$  1 SE.**

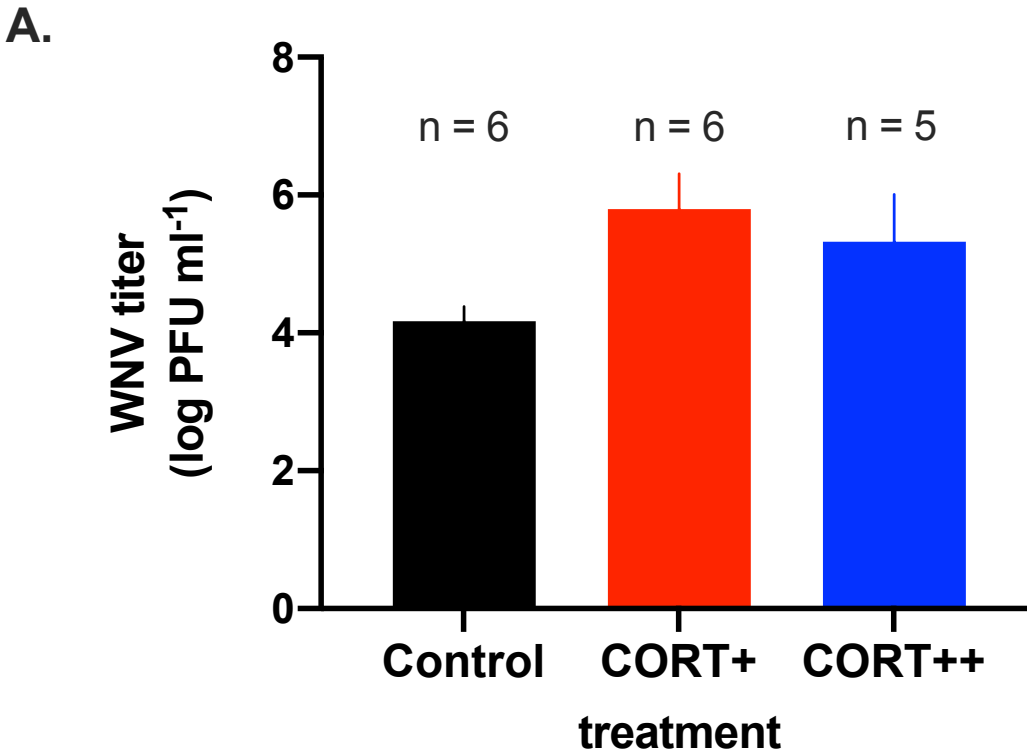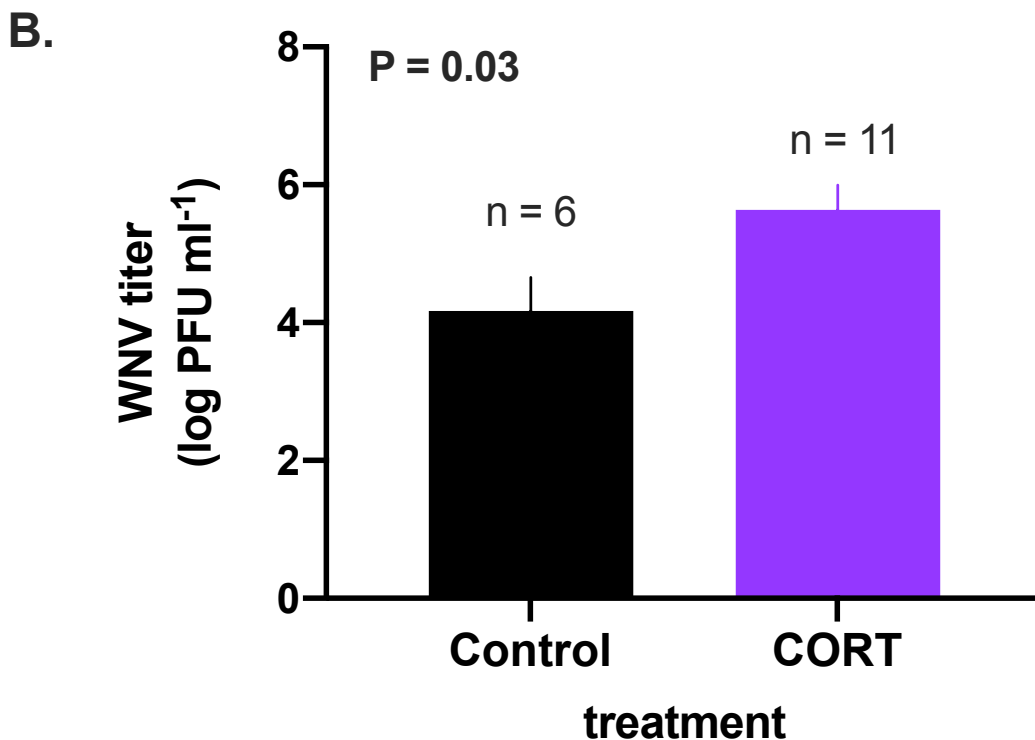

**Fig. 2. CORT treatment did not affect A.) number of mosquitoes found alive or B.) number of fully engorged mosquitoes the morning post-feeding. Bars are means  $\pm$  1SE; dotted line denotes total number of mosquitoes ( $n = 23$ ) to which birds were exposed the prior evening. In A., numbers above bars denote total birds from which mosquitoes were collected the following day and total mosquitoes studied for WNV infectivity.**

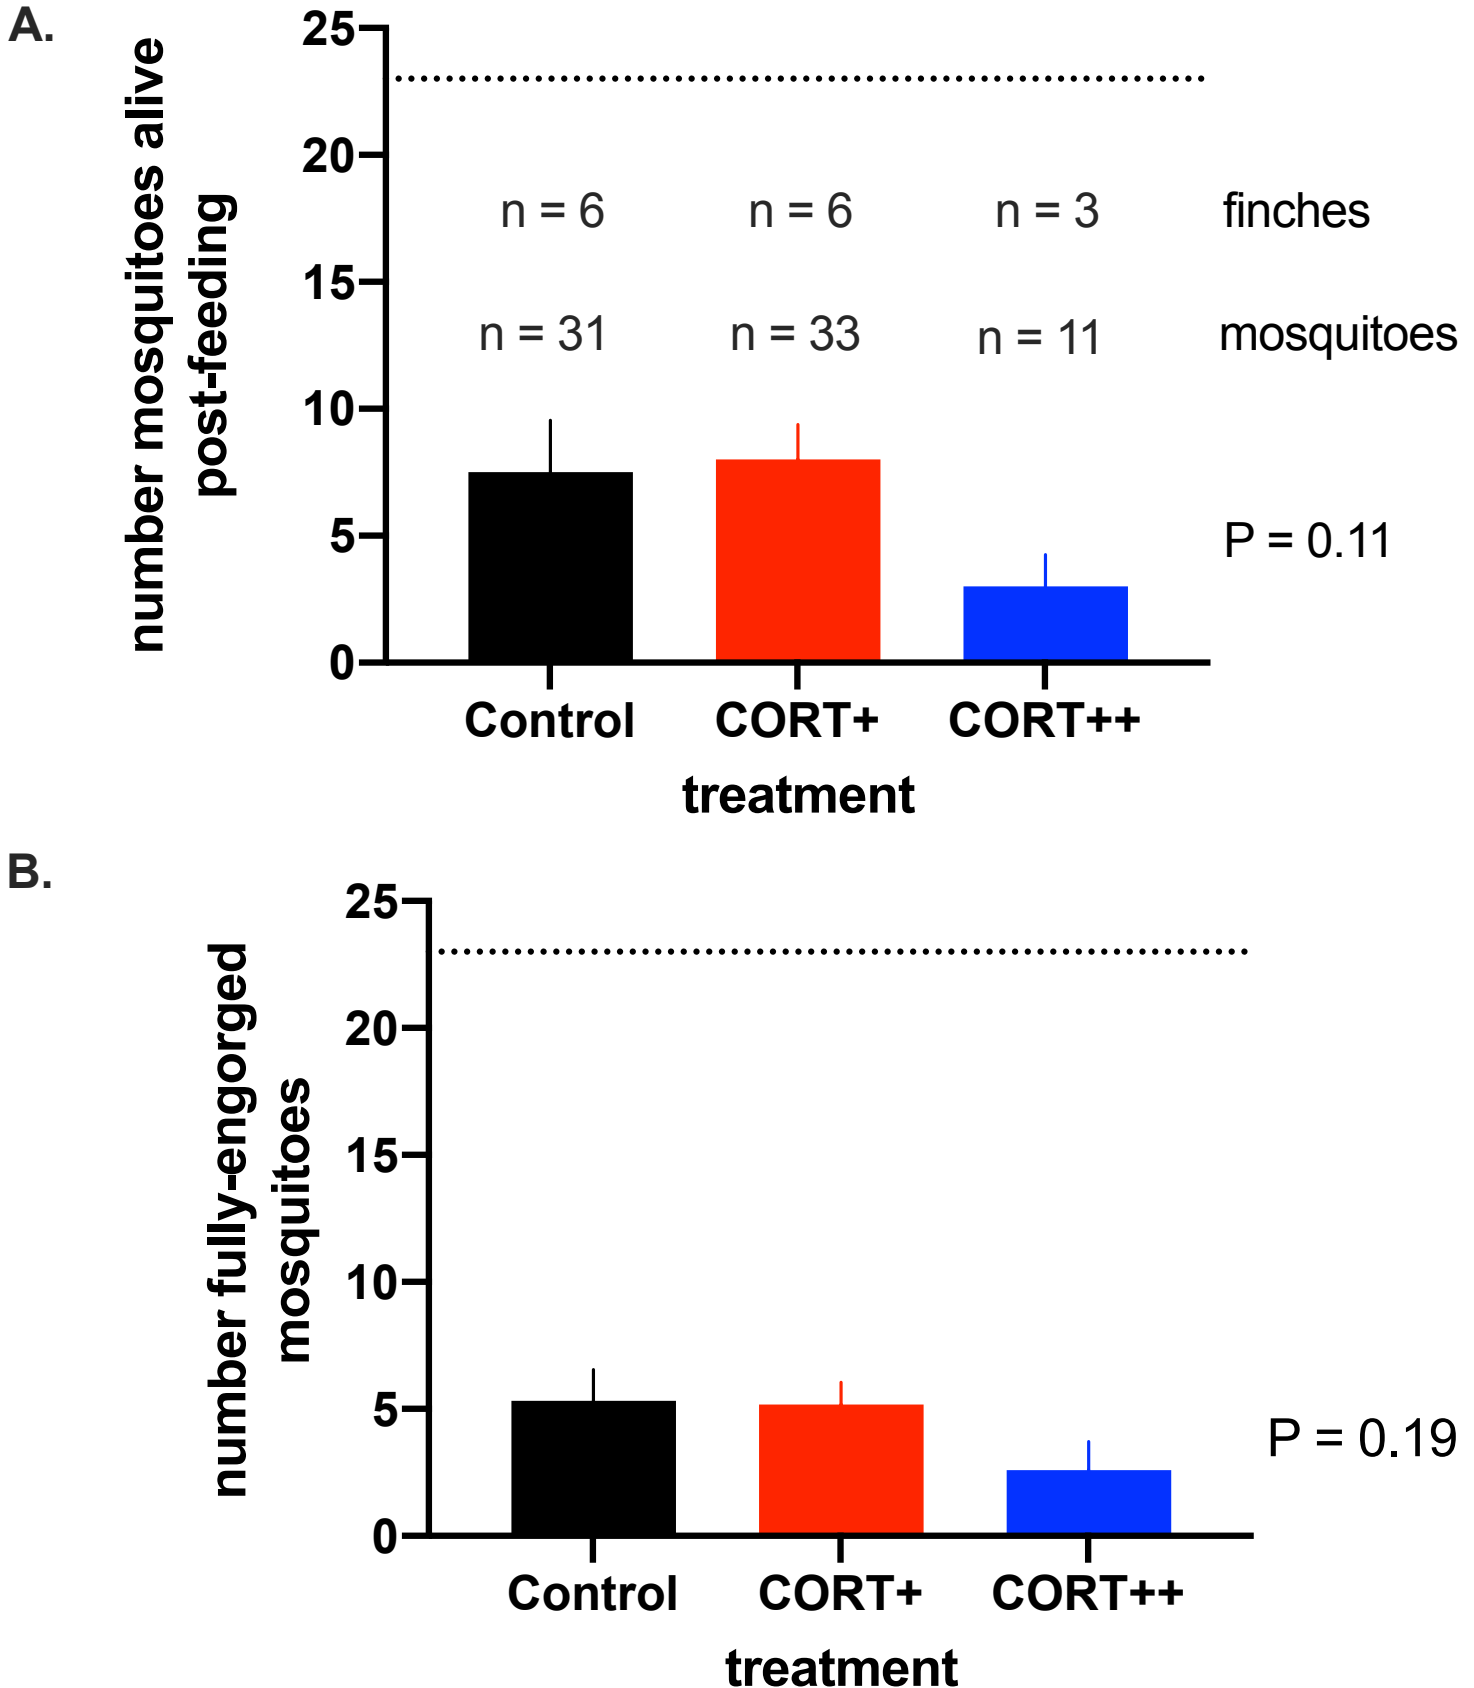

**Fig. 3 No effects of CORT treatment of finches on A. mortality rate or B. WNV infection rate of *C. quinquefasciatus*.** Lines denote A. survival or B. cumulative infection curves (% of birds) over the 14 day monitoring period. Shaded area in A. denotes period of screening of mosquito saliva for WNV. Sample sizes depicted in color denote mosquitoes in each respective group at the time mortality or WNV infection surveillance began.

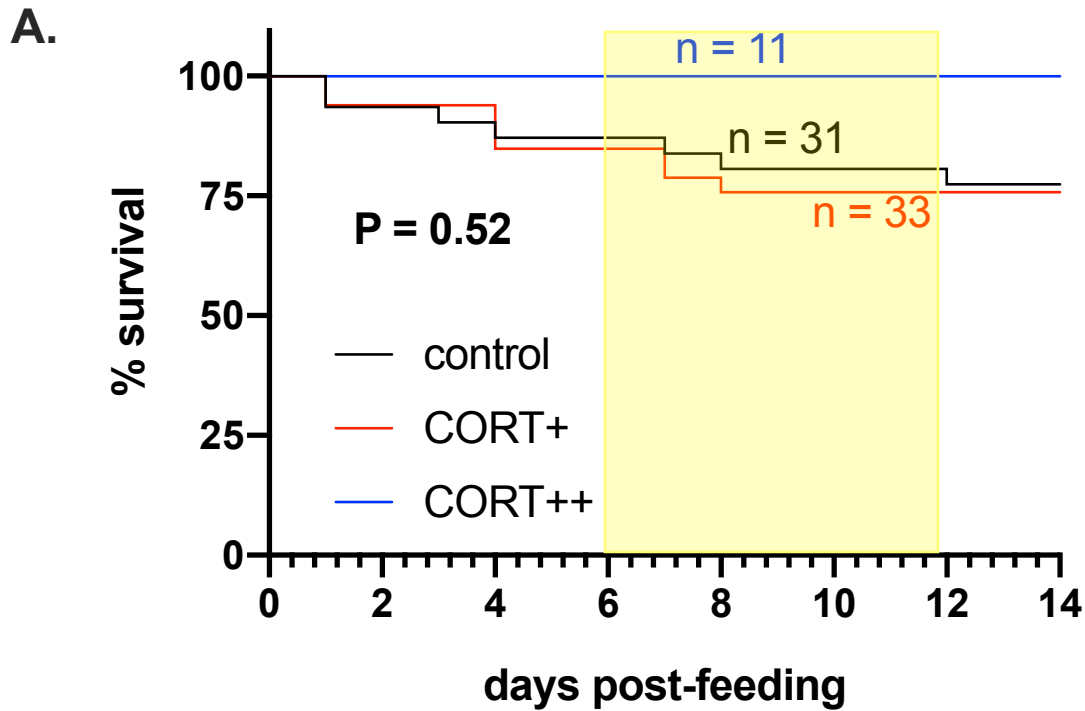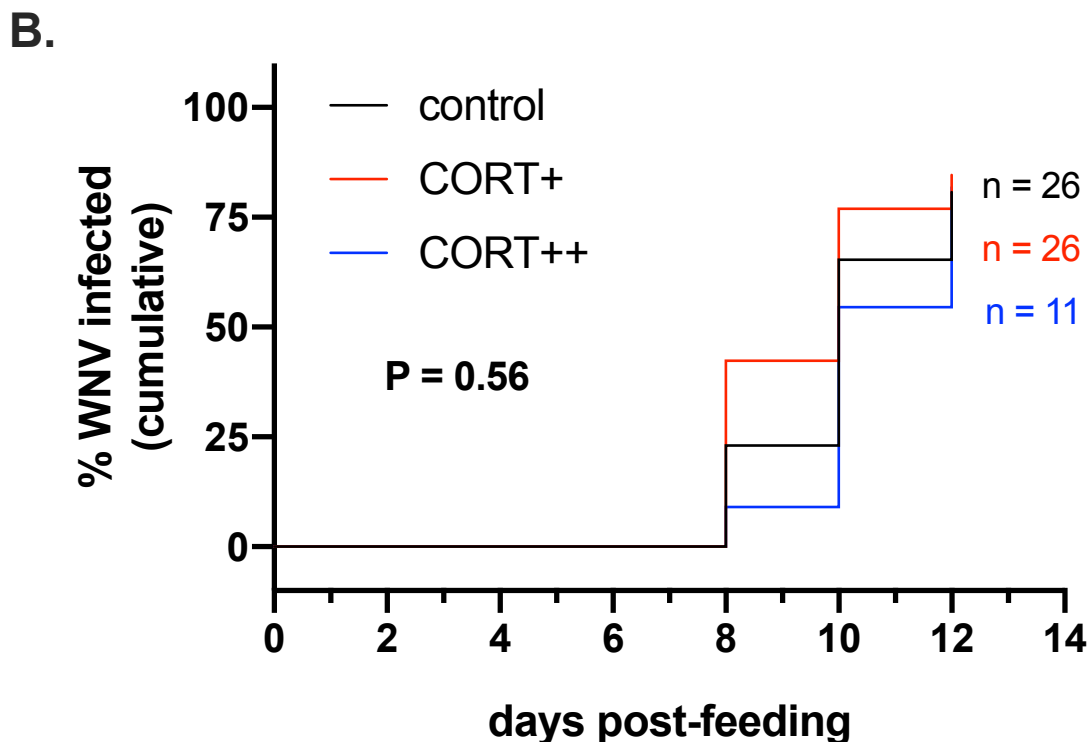

Source: https://biorxiv.org/content/10.1101/2021.05.20.444978v1.full.pdf
